# Supplementary material for: Voluntary Oral Ingestion of a Sedative Prior to Euthanasia with CO2: Behavioural Responses of Mice
Source: MDPI journal article supplement (doi:10.3390/ani11102879), 2021-10-01
Supplement: s1 [file s1]

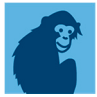

Article

# Voluntary Oral Ingestion of a Sedative Prior to Euthanasia with CO<sub>2</sub>: Behavioural Responses of Mice

Raquel Rodriguez-Sanchez <sup>1</sup>, Elyssa Barnaby <sup>2</sup>, Lucia Améndola <sup>3</sup>, Shen-Yan Hea <sup>4</sup>, Bobby Smith <sup>5</sup>, James Webster <sup>2</sup> and Gosia Zobel <sup>1,\*</sup>

<sup>1</sup> Animal Behaviour and Welfare Team, AgResearch Ltd., Ruakura Research Centre, 10 Bisley Road, Private Bag 3123, 3214 Hamilton, New Zealand; Raquel.Rodriguez@agresearch.co.nz

<sup>2</sup> Animal Ethics Office, AgResearch Ltd., Ruakura Research Centre, 10 Bisley Road, Private Bag 3123, 3214 Hamilton, New Zealand; Elyssa.Barnaby@agresearch.co.nz (E.B.); jim.webster@agresearch.co.nz (J.W.)

<sup>3</sup> Atlantic Veterinary College, University of Prince Edward Island, 550 University Ave, Charlottetown, PE C1A 4P3, Canada; luciamendola@gmail.com

<sup>4</sup> Bioinformatics and Statistics, AgResearch Ltd., Grasslands Research Centre, Tennent Drive, Fitzherbert, 4410 Palmerston North, New Zealand; Shen.Hea@agresearch.co.nz

<sup>5</sup> Small Animal Colony, AgResearch Ltd., Ruakura Research Centre, 10 Bisley Road, Private Bag 3123, 3214 Hamilton, New Zealand; bobby.smith@agresearch.co.nz

\* Correspondence: gosia.zobel@agresearch.co.nz; Tel.: +64-78385911

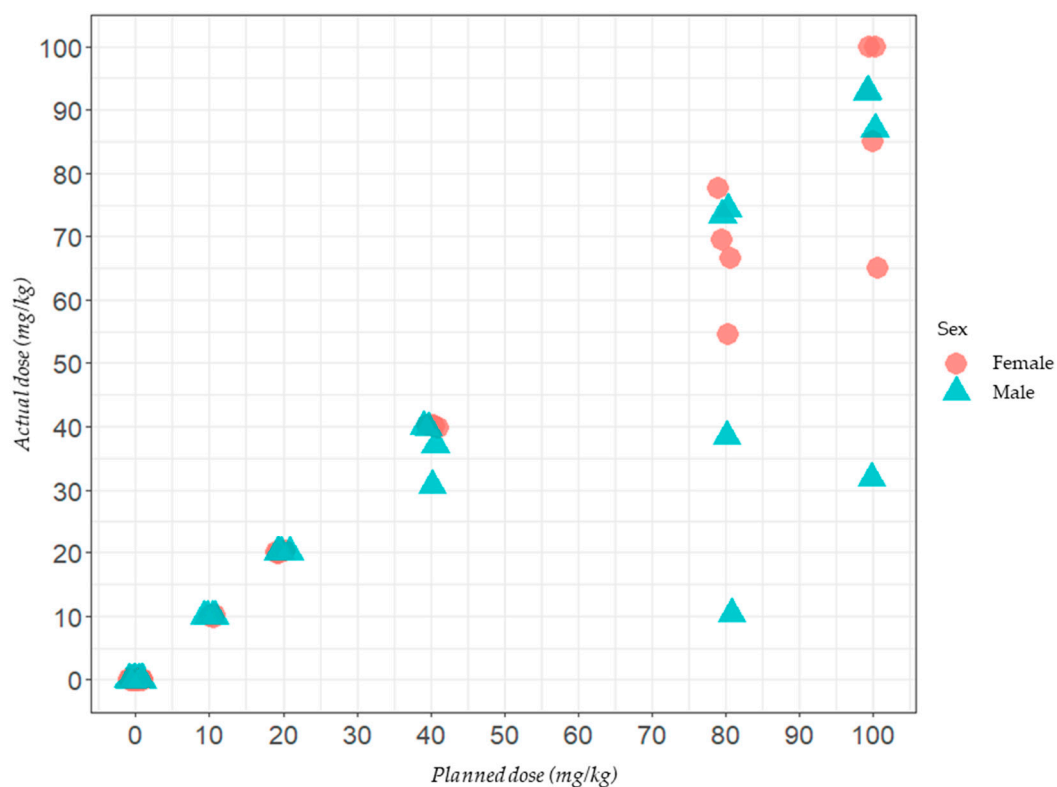

**Figure S1.** Planned *vs.* actual doses of tiletamine-zolazepam for each individual C57BL/6 male and female mouse. Planned doses were 0 (Control), 10 (Z10), 20 (Z20), 40 (Z40), 80 (Z80) and 100 (Z100) mg/kg, however, not all mice consumed the full amount of dispensed cream cheese on the day of euthanasia. Symbols have been jittered.

[illegible]

Table S1. Continued.

| Behaviour                             | Treatment | Mean  | Min | Max   | Q1   | Median | Q3    | SD     | n <sup>2</sup> |
|---------------------------------------|-----------|-------|-----|-------|------|--------|-------|--------|----------------|
| <i>Recumbency<sup>4</sup> (s)</i>     |           |       |     |       |      |        |       |        |                |
|                                       | Control   | 0.0   | 0.0 | 0.0   | 0.0  | 0.0    | 0.0   | 0.00   | 38             |
|                                       | Z10       | 0.3   | 0.0 | 2.5   | 0.0  | 0.0    | 0.0   | 0.88   | 8              |
|                                       | Z20       | 8.9   | 0.0 | 64.6  | 0.0  | 0.0    | 1.6   | 22.63  | 8              |
|                                       | Z40       | 1.8   | 0.0 | 9.6   | 0.0  | 0.0    | 1.8   | 3.39   | 8              |
|                                       | Z80       | 342.9 | 0.0 | 786.4 | 0.0  | 308.4  | 627.8 | 357.72 | 8              |
|                                       | Z100      | 83.5  | 1.3 | 170.5 | 1.8  | 81.2   | 162.9 | 94.63  | 4              |
| <i>Walking on lid<sup>4</sup> (s)</i> |           |       |     |       |      |        |       |        |                |
|                                       | Control   | 87.3  | 0.0 | 252.5 | 47.0 | 71.0   | 111.4 | 63.75  | 38             |
|                                       | Z10       | 24.9  | 0.0 | 47.4  | 11.3 | 24.2   | 39.6  | 17.82  | 8              |
|                                       | Z20       | 18.7  | 0.0 | 82.1  | 0.0  | 3.4    | 24.6  | 29.52  | 8              |
|                                       | Z40       | 27.4  | 0.0 | 135.3 | 0.0  | 6.7    | 30.3  | 46.51  | 8              |
|                                       | Z80       | 2.3   | 0.0 | 11.1  | 0.0  | 0.0    | 1.9   | 4.41   | 8              |
|                                       | Z100      | 0.0   | 0.0 | 0.0   | 0.0  | 0.0    | 0.0   | 0.00   | 4              |
| <i>Paddling<sup>4</sup> (s)</i>       |           |       |     |       |      |        |       |        |                |
|                                       | Control   | 0.0   | 0.0 | 0.0   | 0.0  | 0.0    | 0.0   | 0.00   | 38             |
|                                       | Z10       | 0.0   | 0.0 | 0.0   | 0.0  | 0.0    | 0.0   | 0.00   | 8              |
|                                       | Z20       | 0.0   | 0.0 | 0.0   | 0.0  | 0.0    | 0.0   | 0.00   | 8              |
|                                       | Z40       | 0.0   | 0.0 | 0.0   | 0.0  | 0.0    | 0.0   | 0.00   | 8              |
|                                       | Z80       | 23.8  | 0.0 | 169.7 | 0.0  | 0.0    | 7.4   | 59.22  | 8              |
|                                       | Z100      | 0.0   | 0.0 | 0.0   | 0.0  | 0.0    | 0.0   | 0.00   | 4              |
| <i>Shaking<sup>4</sup> (s)</i>        |           |       |     |       |      |        |       |        |                |
|                                       | Control   | 0.0   | 0.0 | 0.0   | 0.0  | 0.0    | 0.0   | 0.00   | 38             |
|                                       | Z10       | 7.8   | 0.0 | 62.7  | 0.0  | 0.0    | 0.0   | 22.17  | 8              |
|                                       | Z20       | 2.4   | 0.0 | 19.3  | 0.0  | 0.0    | 0.0   | 6.82   | 8              |
|                                       | Z40       | 1.9   | 0.0 | 11.9  | 0.0  | 0.0    | 0.9   | 4.22   | 8              |
|                                       | Z80       | 358.4 | 0.0 | 786.4 | 0.0  | 284.7  | 755.3 | 378.20 | 8              |
|                                       | Z100      | 14.0  | 0.0 | 43.9  | 0.0  | 6.0    | 20.0  | 20.74  | 4              |

<sup>1</sup> These behaviours were recorded for the first 800 seconds of the observation period.

<sup>2</sup> Each treatment contained 2 cages of female pair-housed mice and 2 cages of male pair-housed mice; each of these was matched with a randomly assigned control, resulting in a total of 8 control mice per treatment, and a total of 40 control mice for the entire study. There were 2 mice from Control group and 4 mice from Z100 treatment that could not be considered for the behavioural analysis during the sedation period due to a camera recording issue.

<sup>3</sup> Jumping and rearing were reported as number of incidents (*frequency, f*).

<sup>4</sup> Ataxia, immobility, laboured breathing, recumbency, walking on lid, paddling, and shaking were reported as durations (*seconds, s*).

**Table S2.** Descriptive data for the duration<sup>1</sup> of behaviours recorded during the euthanasia period in C57BL/6 mice

| Behaviour                                                            | Treatment | Mean | Min  | Max   | Q1   | Median | Q3   | SD    | n <sup>2</sup> |
|----------------------------------------------------------------------|-----------|------|------|-------|------|--------|------|-------|----------------|
| <i>Latency to ataxia from CO<sub>2</sub> started (s)</i>             |           |      |      |       |      |        |      |       |                |
|                                                                      | Control   | 16.0 | 10.5 | 20.8  | 14.7 | 16.2   | 17.2 | 2.36  | 40             |
|                                                                      | Z10       | 16.4 | 11.4 | 20.4  | 15.5 | 16.1   | 17.4 | 2.86  | 8              |
|                                                                      | Z20       | 16.6 | 13.3 | 18.7  | 16.2 | 16.6   | 17.3 | 1.68  | 8              |
|                                                                      | Z40       | 10.1 | 2.0  | 16.2  | 5.7  | 11.4   | 15.2 | 6.11  | 8              |
|                                                                      | Z80       | 11.4 | 8.3  | 14.5  | 9.9  | 11.3   | 12.7 | 2.61  | 4              |
|                                                                      | Z100      | 6.7  | 2.3  | 14.0  | 2.8  | 3.8    | 11.1 | 5.50  | 6              |
| <i>Latency to recumbency from ataxia (s)</i>                         |           |      |      |       |      |        |      |       |                |
|                                                                      | Control   | 8.7  | 3.8  | 19.6  | 6.8  | 7.9    | 9.6  | 3.30  | 40             |
|                                                                      | Z10       | 6.9  | 4.9  | 10.5  | 5.6  | 6.2    | 7.4  | 2.19  | 8              |
|                                                                      | Z20       | 9.5  | 5.7  | 14.1  | 8.5  | 9.2    | 10.5 | 2.45  | 8              |
|                                                                      | Z40       | 14.8 | 9.2  | 19.9  | 11.8 | 15.0   | 18.3 | 4.19  | 8              |
|                                                                      | Z80       | 11.0 | 9.1  | 14.4  | 9.5  | 10.3   | 11.8 | 2.37  | 4              |
|                                                                      | Z100      | 14.6 | 4.5  | 20.9  | 9.5  | 17.4   | 19.7 | 7.07  | 6              |
| <i>Latency to laboured breathing from recumbency (s)<sup>3</sup></i> |           |      |      |       |      |        |      |       |                |
|                                                                      | Control   | 1.3  | -0.5 | 4.2   | 0.7  | 0.9    | 1.6  | 0.92  | 40             |
|                                                                      | Z10       | 1.5  | 0.8  | 2.4   | 1.2  | 1.3    | 1.8  | 0.50  | 8              |
|                                                                      | Z20       | 3.1  | 0.6  | 8.6   | 1.8  | 2.7    | 3.5  | 2.46  | 8              |
|                                                                      | Z40       | 1.1  | 0.3  | 2.6   | 0.8  | 0.9    | 1.3  | 0.68  | 8              |
|                                                                      | Z80       | 0.5  | -0.9 | 1.0   | 0.4  | 0.9    | 0.9  | 0.91  | 4              |
|                                                                      | Z100      | 1.8  | 0.6  | 3.0   | 0.9  | 1.7    | 2.7  | 1.06  | 6              |
| <i>Latency to last breath from laboured breathing (s)</i>            |           |      |      |       |      |        |      |       |                |
|                                                                      | Control   | 70.4 | 59.7 | 99.5  | 65.7 | 70.7   | 73.3 | 7.33  | 40             |
|                                                                      | Z10       | 71.1 | 57.7 | 86.9  | 62.3 | 71.6   | 78.3 | 10.70 | 8              |
|                                                                      | Z20       | 76.5 | 62.6 | 92.5  | 69.5 | 75.1   | 82.8 | 10.68 | 8              |
|                                                                      | Z40       | 80.8 | 72.6 | 100.1 | 76.0 | 79.0   | 82.3 | 8.78  | 8              |
|                                                                      | Z80       | 83.6 | 69.6 | 89.1  | 82.4 | 87.8   | 89.0 | 9.39  | 4              |
|                                                                      | Z100      | 91.8 | 83.0 | 106.2 | 84.0 | 90.4   | 96.8 | 9.43  | 6              |

<sup>1</sup> All behaviours reported as durations (*seconds, s*).

<sup>2</sup> Each treatment contained 2 cages of female pair-housed mice and 2 cages of male pair-housed mice; each of these was matched with a randomly assigned control, resulting in a total of 8 control mice per treatment, and a total of 40 control mice for the entire study. There were 4 mice in Z80 group and 2 mice in Z100 group that were already recumbent before the euthanasia and could not be considered for the progression of events during the euthanasia.

<sup>3</sup> Some mice had already become recumbent prior to experiencing laboured breathing, which resulted in negative values for this variable.
